# Supplementary material for: Delayed induction of type I and III interferons mediates nasal epithelial cell permissiveness to SARS-CoV-2
Source: PubMed Central journal article supplement (PMC8651658; doi:10.1038/s41467-021-27318-0), 2021-12-07
Supplement: 41467_2021_27318_MOESM1_ESM.pdf [file 41467_2021_27318_MOESM1_ESM.pdf]

1 **Delayed induction of type I and III interferons mediates nasal epithelial cell permissiveness to**  
2 **SARS-CoV-2**

3 Catherine F Hatton<sup>1a</sup>, Rachel A Botting<sup>2a</sup>, Maria Emilia Dueñas<sup>2a</sup>, Iram J Haq<sup>1,3a</sup>, Bernard Verdon<sup>2a</sup>,  
4 Benjamin J Thompson<sup>1</sup>, Jarmila Stremenova Spegarova<sup>1</sup>, Florian Gothe<sup>1,4</sup>, Emily Stephenson<sup>2</sup>, Aaron I  
5 Gardner<sup>1</sup>, Sandra Murphy<sup>2</sup>, Jonathan Scott<sup>1</sup>, James P Garnett<sup>1</sup>, Sean Carrie<sup>5</sup>, Jason Powell<sup>1</sup>, C M Anjam  
6 Khan<sup>2</sup>, Lei Huang<sup>1</sup>, Rafiqul Hussain<sup>6</sup>, Jonathan Coxhead<sup>6</sup>, Tracey Davey<sup>7</sup>, A John Simpson<sup>1</sup>, Muzlifah  
7 Haniffa<sup>2,8,9,10</sup>, Sophie Hambleton<sup>1,11</sup>, Malcolm Brodrie<sup>1,3b</sup>, Chris Ward<sup>1b</sup>, Matthias Trost<sup>2b</sup>, Gary  
8 Reynolds<sup>2b</sup>, Christopher J A Duncan<sup>1,12 b\*</sup>

9

10 **Supplementary Materials**

11

12 **Contents**

13 Supplementary figures 1-10

14 Supplementary tables 1-6

15 Supplementary Methods

16 Note supplementary datasets S1-6 (xls files) are not included in this file

17

18

19

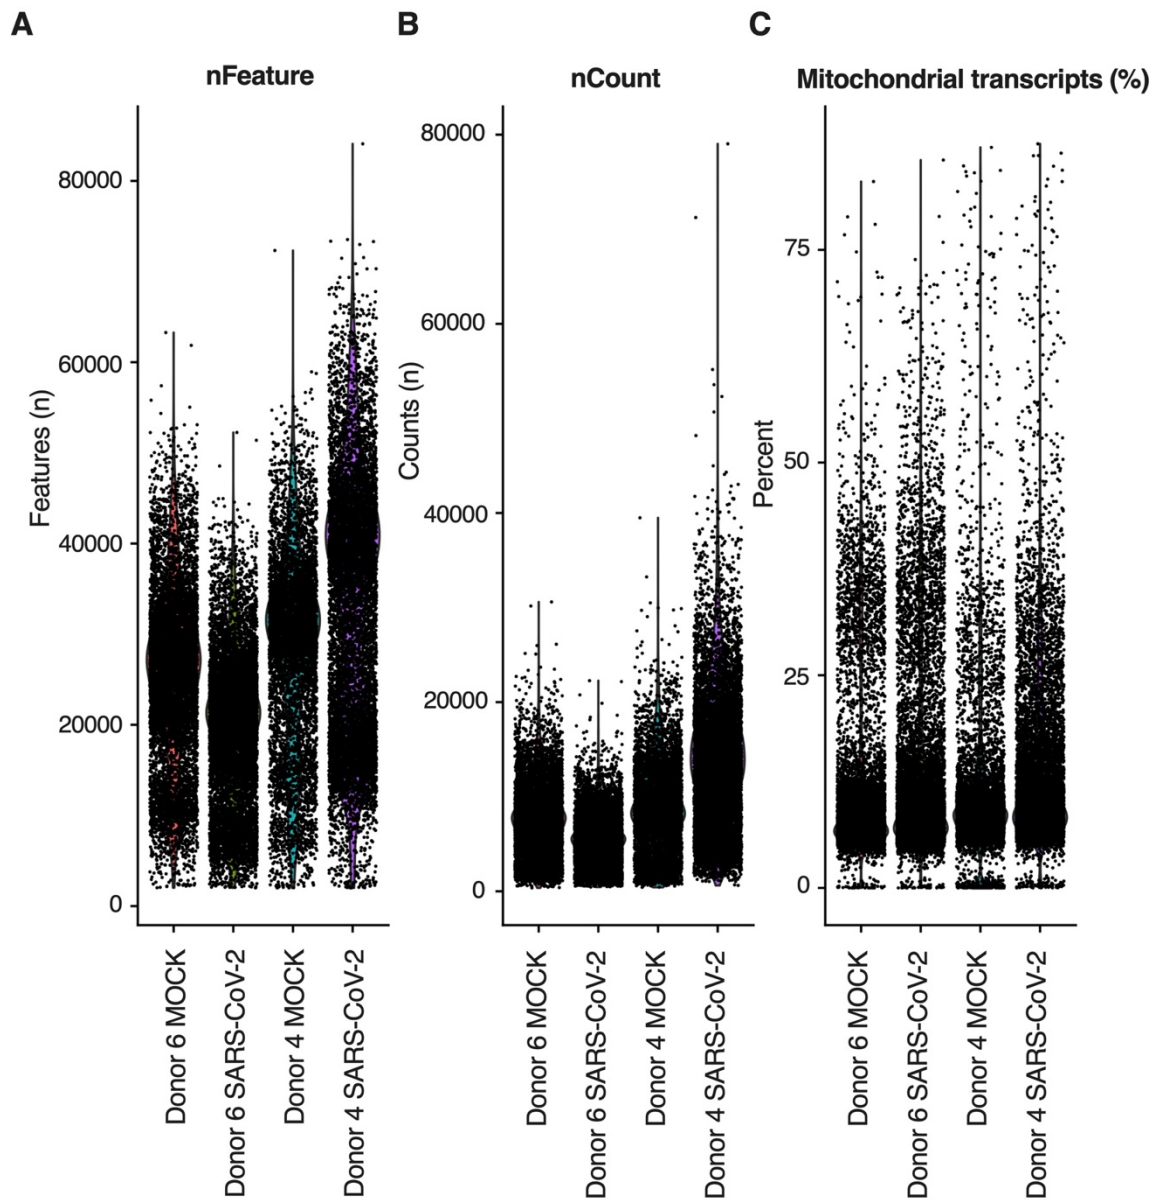

21

22 **Supplementary figure 1.** Single cell RNA sequencing quality control plots. Violin plots, split by  
 23 sample, showing (A) the total number of genes detected in each cell (B) the total number of counts  
 24 detected in each cell and (C) the proportion (as a percentage) of mitochondrial transcripts in each  
 25 cell. For individual quality control (QC) metrics see also Supplementary table 1.

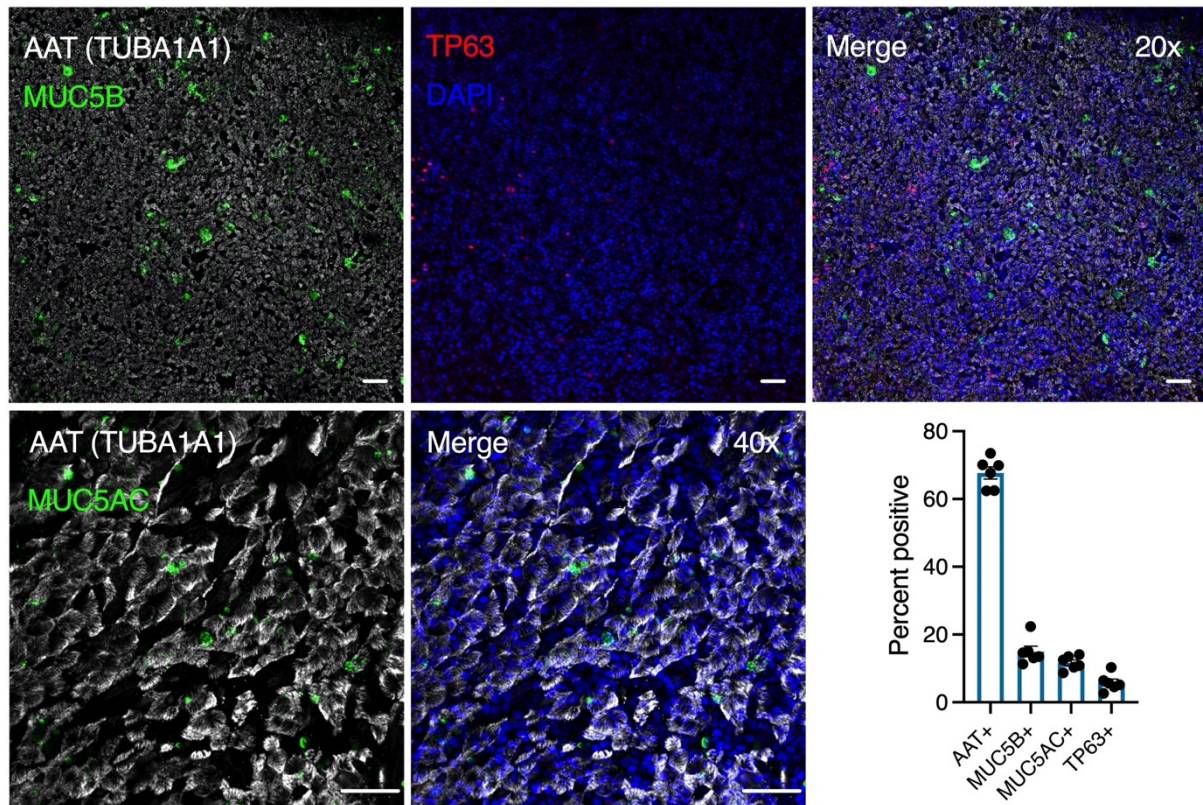

26

27 **Supplementary figure 2.** Immunofluorescence analysis of ciliated (AAT+), secretory (MUC5B+), goblet  
 28 (MUC5AC+) and basal (TP63+) cells in nasal ALLI cultures. Representative images from n=6 donors, data  
 29 are presented as mean values +/- SEM, scale bar = 20 mm (top panel 20x magnification, bottom panel  
 30 40x magnification as indicated). Frequency of cell type as a proportion of cells counted is displayed in  
 31 the bar plot. MUC5B and MUC5AC co-staining demonstrated no overlap in immunoreactivity (data not  
 32 shown). AAT = acetylated-alpha tubulin, tumour protein 63 = TP63, MUC = mucin.

33

34

35

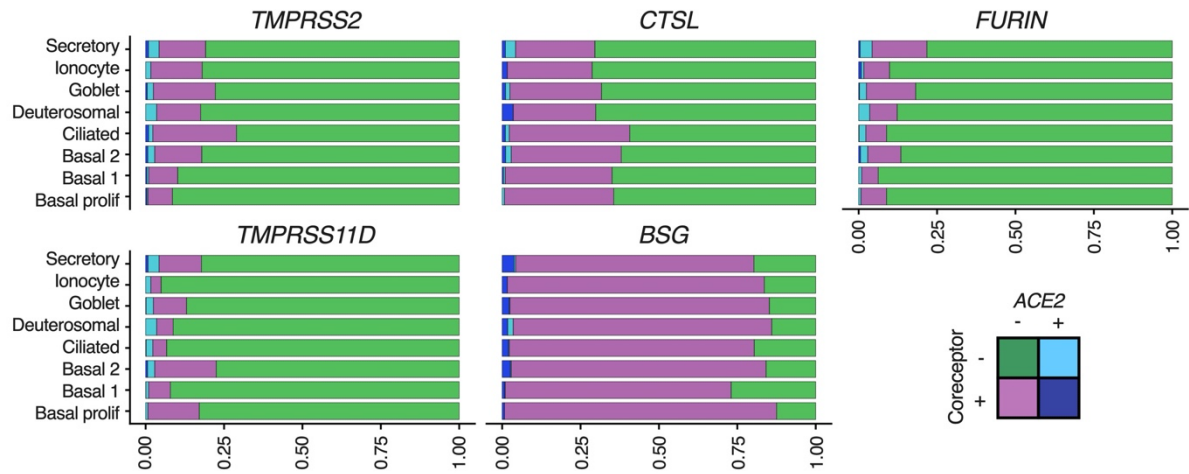

36

37 **Supplementary figure 3.** Single-cell RNA-seq analysis of entry receptor expression by cell type. Bars

38 represent the proportion of cells expressing each combination of *ACE2* and other transcript,

39 coloured according to the key. Dark blue represents the proportion of cells of each type expressing

40 both *ACE2* and the relevant additional transcript. Data from analysis of 28,346 cells from n=2 donors.

41

42

43

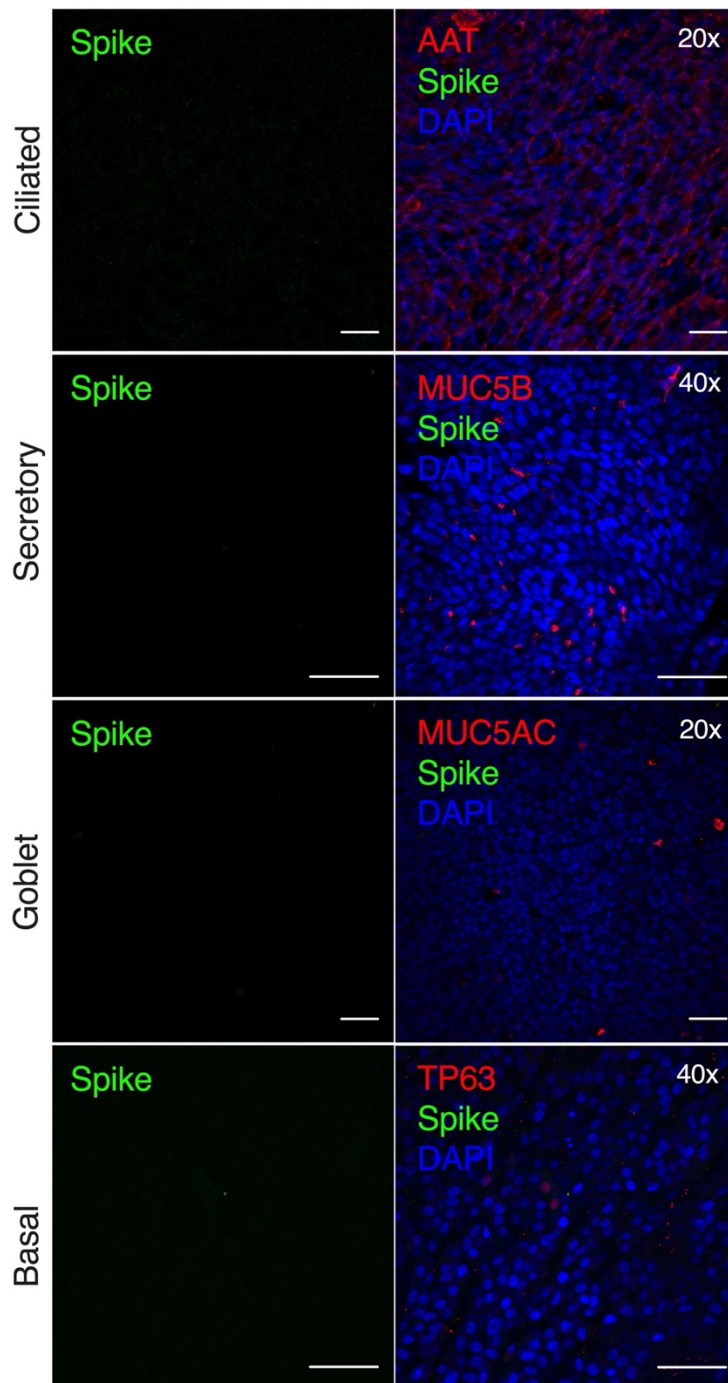

44

45 **Supplementary figure 4.** Immunofluorescence analysis of Spike (S) protein immunoreactivity in  
 46 mock infected nasal ALI cultures. Displayed are mock infected ciliated (AAT+), secretory (MUC5B+),  
 47 goblet (MUC5AC+) and basal (TP63+) cells stained for S protein. Representative images from n=5  
 48 donors, scale bar = 20 mm (images at 20x or 40x magnification as indicated). AAT = acetylated-alpha  
 49 tubulin, tumour protein 63 = TP63, MUC = mucin.

50

51

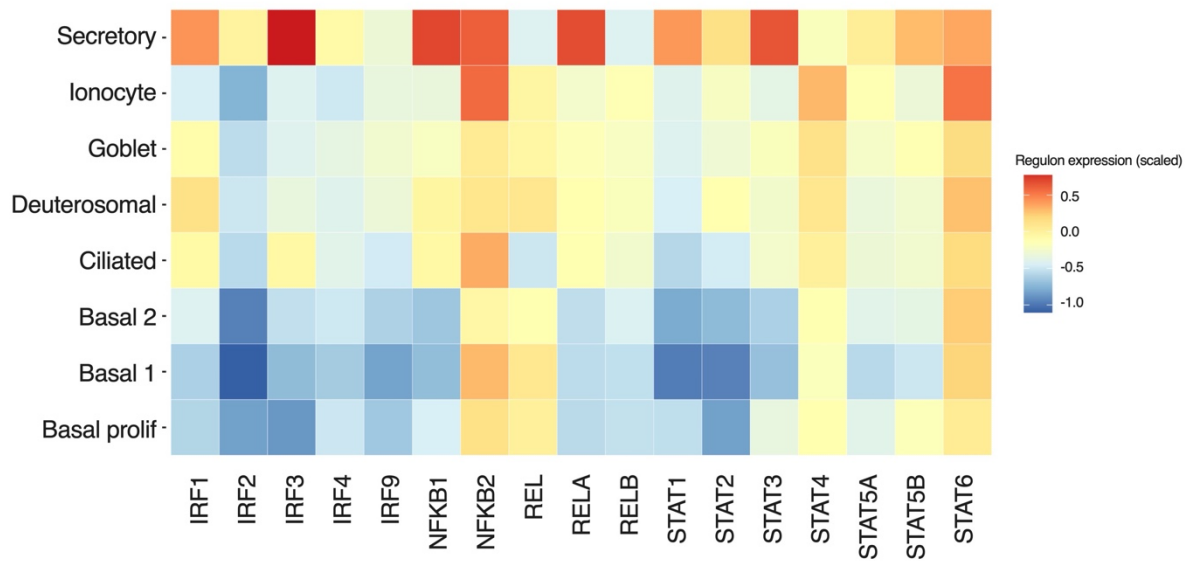

52

53 **Supplementary figure 5.** DoRoThea/VIPER analysis of regulon activity in infected cells. Median  
54 regulon activity per cluster in infected cells, corrected for activity in uninfected cells by subtraction  
55 then Z-normalised by Transcription Factor (TF) (i.e. values > 0 imply TF more active in infected cells).  
56 Data from analysis of 28,346 cells total to estimate regulon activity of which 8,861 infected, from n=2  
57 donors at 24 hours post infection. DoRoThea = Discriminant Regulon Expression Analysis, VIPER =  
58 Visualization Pipeline for RNA-seq analysis.

59

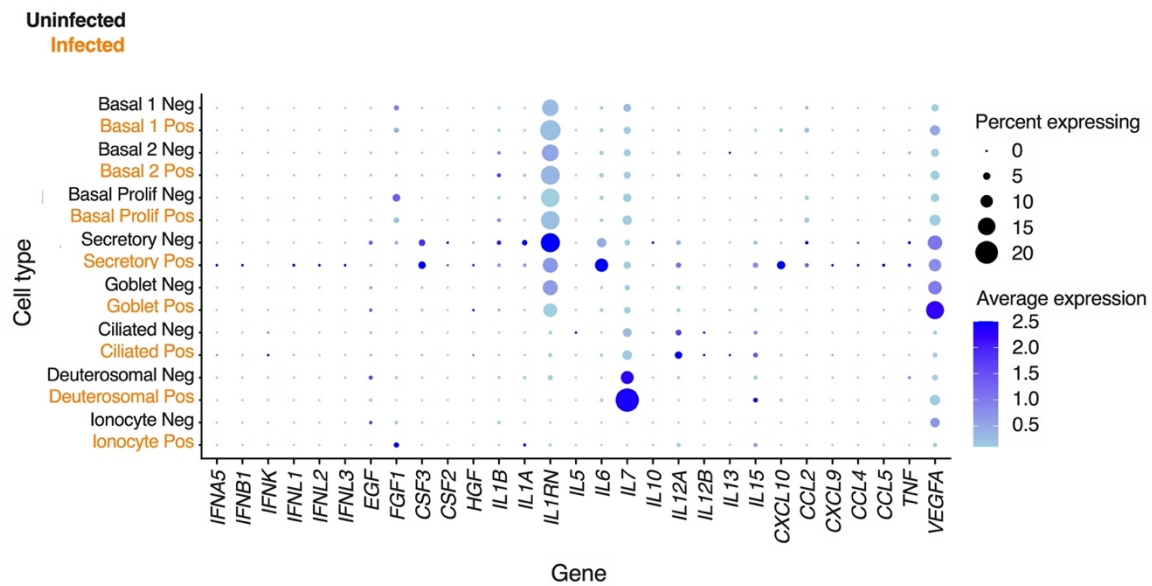

60

61 **Supplementary figure 6.** Interferon, chemokine and cytokine induction in response to SARS-CoV-2.

62 Dot plot showing single-cell RNA-seq analysis of cytokine and chemokine transcript detection in n=2

63 donors at 24 hours post infection (size of dots represent proportion of cells expressing and colour

64 represents mean expression). Uninfected cells are labelled black (Negative) and infected cells orange

65 (Positive) based on expression of SARS-CoV-2 mRNA. Low-level induction of certain proinflammatory

66 cytokines (*IL6*, *IL12A*, *IL15*), chemokines (*CXCL9*, *CXCL10*) and *VEGFA* is demonstrated in SARS-CoV-2-

67 infected nasal cells.

68

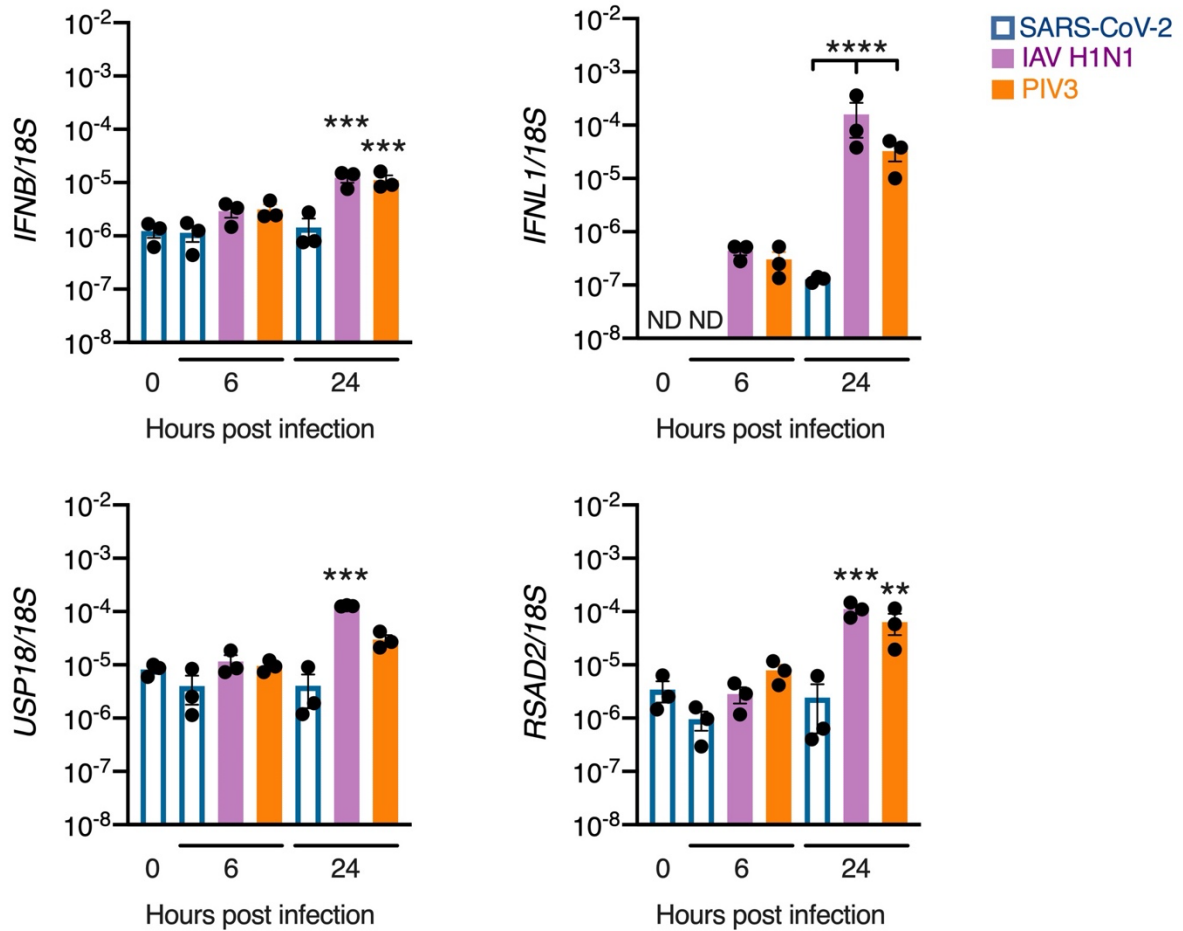

69

70 **Supplementary figure 7.** Delayed induction of IFNs and ISGs in response to SARS-CoV-2 compared to

71 other viruses. RT-PCR analysis of *IFNB* (mock vs PIV3 24h  $p = 0.0008$ , mock vs IAV 24h  $p = 0.0006$ ),

72 *IFNL1* (SARS2 24h vs IAV 24h  $p < 0.0001$ , SARS2 24h vs PIV3 24h  $p < 0.0001$ ), *USP18* (mock vs IAV 24h

73  $p = 0.0004$ ) and *RSAD2* (mock vs IAV 24h  $p = 0.0007$ , mock vs PIV3 24h  $p = 0.0052$ ) expression in nasal

74 ALI cultures mock infected (0 hour) or exposed to SARS-CoV-2 (open bars), influenza A virus (IAV H1N1,

75 purple bars) or parainfluenza 3 virus (PIV3, orange bars) for the times displayed, all at MOI 0.1 ( $n=3$

76 donors, mean  $\pm$  SEM; ANOVA, two-sided, with Dunnett's post-test correction compared to 0 hour, or

77 Sidak's post-test correction [all viruses compared at 24 hours post infection]). ND = not detected, MOI

78 = multiplicity of infection.

79

80



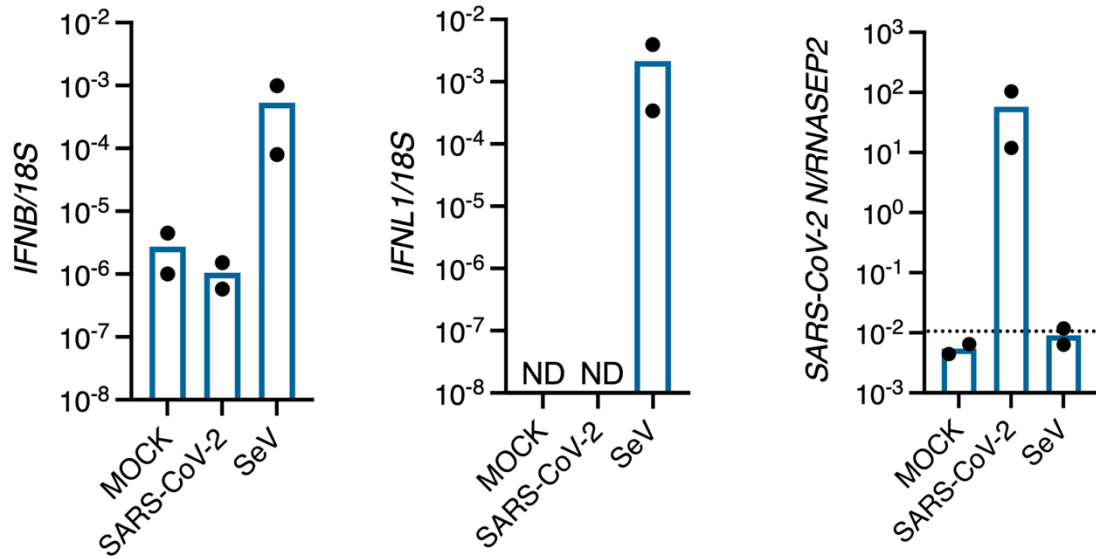

81

82 **Supplementary figure 8.** Robust nasal cell expression of *IFNB* and *IFNL1* in response to Sendai virus.

83 RT-PCR analysis of *IFNB*, *IFNL1* and SARS-CoV-2 *N* gene expression in nasal ALLI cultures exposed to

84 SARS-CoV-2 (MOI 2) or a DVG-rich stock of Sendai virus (SeV) for 6 hours (n=2 donors). ND = not

85 detected, MOI = multiplicity of infection, DVG = defective viral genomes.

86

87

88

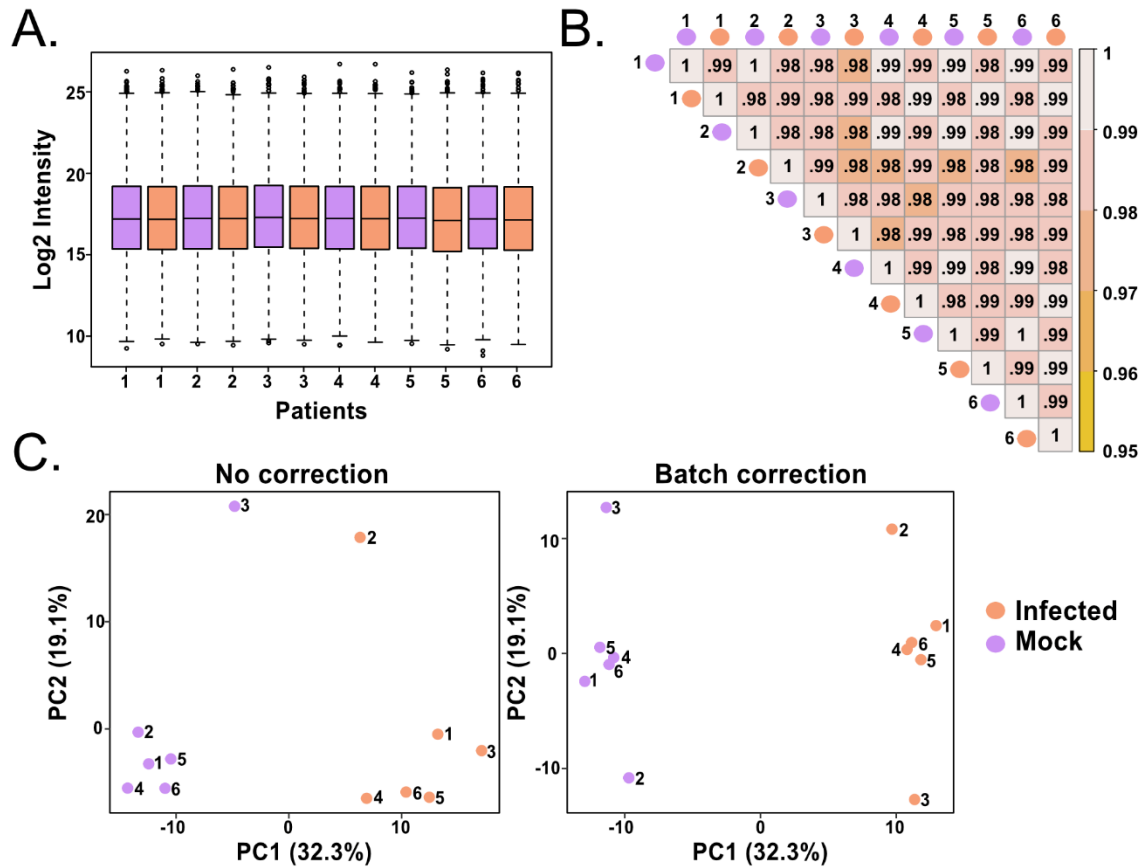

89

90 **Supplementary figure 9.** Quality control measures for the proteomics data set (n=6 donors). (A)

91 Boxplot of log2 transformed samples shows equal loading. The bottom and the top of the boxes

92 correspond to the 25th (Q1) and 75th (Q3) percentiles, and the internal band is the 50th percentile

93 (median). The plot whiskers represent the 95% confidence intervals shown down to the minimum (Q1-

94  $1.5 \times \text{IQR}$ ) and up to the maximum ( $\text{Q3} + 1.5 \times \text{IQR}$ ) value. IQR= interquartile range. Outside points

95 correspond to potential outliers. (B) Pearson correlation heatmap among the log2 transformed

96 samples shows high reproducibility between samples. (C) Principal component (PC) analysis plots with

97 no correction (left) and after removing patient batch effects (right).

98

99

100

101

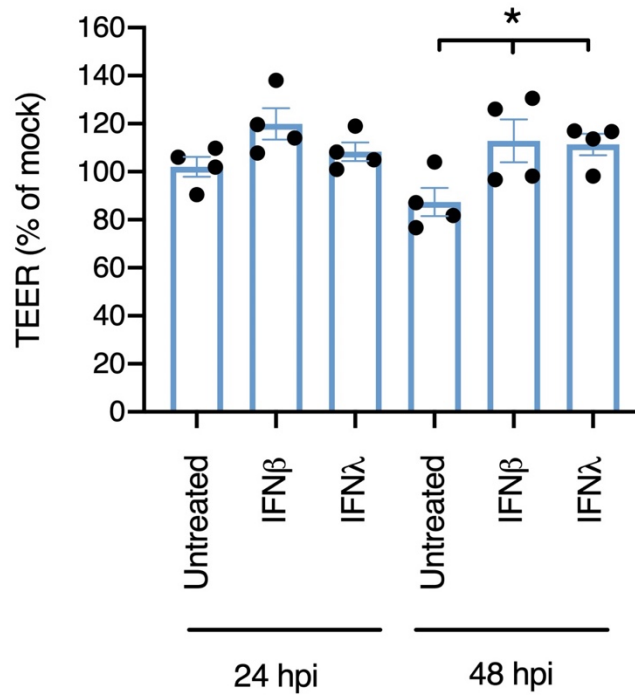

102

103 **Supplementary figure 10.** IFN treatment preserves barrier integrity in the face of SARS-CoV-2

104 infection. Trans-epithelial resistance (TEER) measurement (expressed as % of mock infected controls)

105 at 24 and 48 hours post infection (MOI 0.01) were compared to cells pre-treated for 16 hours with

106 IFNβ1 (1000 IU/mL) or IFNλ1 (100 ng/mL). Repeat experiments in n=4 donors, mean ± SEM; \* P < 0.05,

107 ANOVA, two-sided, with Sidak's post-test correction (untreated vs IFNβ p = 0.0210, untreated vs IFNλ

108 p = 0.0307). MOI = multiplicity of infection.

109

110

111

112

113

114 **Supplementary Tables**

| Sample_id       | Total number of reads | Mean reads per cell | Alignment rate (%) | Reads mapped to GRCh38 (5) | Reads mapped to SARS-CoV-2 | Estimated number of cells |
|-----------------|-----------------------|---------------------|--------------------|----------------------------|----------------------------|---------------------------|
| Donor4_Mock     | 184,897,338           | 14,329              | 91.3               | 91.3                       | 0                          | 12,904                    |
| Donor4_Infected | 807,865,486           | 61,100              | 87.7               | 77.1                       | 10.8                       | 13,222                    |
| Donor6_Mock     | 232,499,890           | 17,121              | 90.4               | 90.4                       | 0                          | 13,580                    |
| Donor6_Infected | 174,974,839           | 13,653              | 90                 | 88.8                       | 1.3                        | 12,816                    |

115

116 **Supplementary table 1.** Single cell RNA-seq post-alignment quality control metrics. Quality control

117 output from CellRanger following alignment.

118

| GO_TERM                                               | FDR Adjusted P value |
|-------------------------------------------------------|----------------------|
| Defence response to virus                             | 4.5E-28              |
| Type I interferon signalling pathway                  | 2.3E-18              |
| Response to virus                                     | 1.4E-13              |
| Negative regulation of viral genome regulation        | 5.7E-11              |
| Interferon gamma-mediated signalling pathway          | 5.8E-9               |
| Innate immune response                                | 7.6E-5               |
| Intracellular transport of viral protein in host cell | 6.9E-3               |
| Negative regulation of type I interferon production   | 7.2E-3               |
| Antigen processing and presentation via MHC class I   | 1.1E-2               |
| Cellular response to interferon alpha                 | 1.7E-2               |
| Response to interferon alpha                          | 2.0E-2               |

120

121 **Supplementary table 2.** Pathway analysis of proteomics data showing upregulated pathways.

122 Displayed are pathways that have been adjusted for two-sided multiple comparison with Benjamini-

123 Hochberg false-discovery rate (FDR) and a significance threshold (P value < 0.05) was applied.

124

125

| GO_TERM                                                                            | FDR Adjusted P value |
|------------------------------------------------------------------------------------|----------------------|
| TRIF-dependent toll-like receptor signalling pathway                               | 1.5E-2               |
| Regulation of transcription from RNA polymerase II promoter in response to hypoxia | 1.5E-2               |
| Endosomal transport                                                                | 1.7E-2               |
| MyD88-independent toll-like receptor signalling pathway                            | 1.7E-2               |
| Transcription-coupled nucleotide-excision repair                                   | 2.4E-2               |

126

127 **Supplementary table 3.** Gene Ontology (GO) Term analysis of proteomics data showing  
128 downregulated pathways. Displayed are pathways that have been adjusted for two-sided multiple  
129 comparison with Benjamini-Hochberg false-discovery rate (FDR) and a significance threshold (P value  
130 < 0.05) was applied.

131

132

133

134

| Donor no. | Sex    | Age (years) |
|-----------|--------|-------------|
| 1         | Female | 46          |
| 2         | Female | 38          |
| 3         | Male   | 68          |
| 4         | Male   | 78          |
| 5         | Female | 54          |
| 6         | Male   | 41          |

135

136 **Supplementary table 4.** Nasal cell donors.

137

| Gene         | UPL probe | Forward sequence         | Reverse sequence        |
|--------------|-----------|--------------------------|-------------------------|
| <i>IFNB</i>  | #25       | CGACACTGTTTCGTGTTGTCA    | GAAGCACAACAGGAGAGCAA    |
| <i>IFNL1</i> | #75       | GGGACCTGAGGCTTCTCC       | CCAGGACCTTCAGCGTCA      |
| <i>IL6</i>   | #40       | GATGAGTACAAAAGTCCTGATCCA | CTGCAGCCACTGGTTCTGT     |
| <i>IL1B</i>  | #78       | TACCTGTCCTGCGTGTTGAA     | TCTTTGGGTAATTTTTGGGATCT |
| <i>RSAD2</i> | #9        | GAGGGTGAGAATTGTGGAGAAG   | GCGCTCCAAGAATCTTTCAA    |
| <i>USP18</i> | #44       | CAACGTGCCCTTGTTTGTC      | ATCAGGTTCCAGAGTTTGAGGT  |
| <i>ISG15</i> | #23       | GCGAACTCATCTTTGCCAGTA    | CCAGCATCTTCACCGTCAG     |
| <i>18S</i>   | #81       | CCGATTGGATGGTTTAGTGAG    | AGTTCGACCGTCTTCTCAGC    |

139

140 **Supplementary table 5.** Primers/probes. UPL = Roche universal probe library.

141



| Antibody                     | Host   | Dilution      | Source | Code        |
|------------------------------|--------|---------------|--------|-------------|
| Spike                        | Rabbit | 1:1000        | Novus  | nb100-56578 |
| RSAD2                        | Rabbit | 1:1000        | CST    | 13996       |
| ISG15                        | Rabbit | 1:1000        | CST    | 2743        |
| USP18                        | Mouse  | 1:2000        | SCB    | sc-1668     |
| ACE2                         | Rabbit | 1:1000        | Abcam  | ab15348     |
| ACE2                         | Goat   | 1:200         | R&D    | AF933       |
| TMPRSS2                      | Rabbit | 1:1000        | Abcam  | ab92323     |
| MxA                          | Rabbit | 1:1000        | SCB    | sc-50509    |
| GAPDH                        | Rabbit | 1:10,000      | CST    | 5174        |
| MUC5B                        | Rabbit | 1:1000        | Sigma  | HPA008246   |
| MUC5AC                       | Rabbit | 1:1000        | Sigma  | HPA040615   |
| TP63                         | Mouse  | 1:2000        | Abcam  | ab735       |
| Acetylated-alpha tubulin     | Mouse  | 1:1000        | Abcam  | ab24610     |
| Anti-rabbit HRP- conjugated  | Goat   | 1:1000-1:5000 | CST    | 7074        |
| Anti-mouse HRP-conjugated    | Horse  | 1:1000-1:5000 | CST    | 7076        |
| AF488 conjugated anti-mouse  | Goat   | 1:2000        | TFS    | A-11001     |
| AF488 conjugated anti-rabbit | Goat   | 1:2000        | TFS    | A-11008     |
| AF594 conjugated anti-mouse  | Goat   | 1:2000        | TFS    | A-11005     |
| AF594 conjugated anti-rabbit | Goat   | 1:2000        | TFS    | A-11012     |

142

143 **Supplementary table 6.** Antibodies. CST = Cell Signalling; SCB = Santa Cruz Biotechnology; R&D = R&D

144 biosystems; TFS = ThermoFisher Scientific. HRP = horseradish peroxidase.

145

146

147

148 **Supplementary Methods**

149

150 **Proteome sample preparation**

151 Cells were washed three times with cold PBS before addition of solubilisation buffer (5% (w/v) SDS, 50  
152 mM TEAB) to the apical compartment for 10 min at room temperature (RT). Samples were heated at  
153 75°C for 45 min, before freezing and stored at -80°C. Protein concentration was determined by EZQ®  
154 protein quantification assay. A total of 30 µg protein was reduced by incubation with 5 mM tris(2-  
155 carboxyethyl)phosphine for 15 min at 37°C, and subsequently alkylated with 20 mM iodoacetamide  
156 for 30 min at RT in the dark. Protein digestion was performed using the suspension trapping (S-Trap™)  
157 sample preparation method according to the manufacturer's guidelines (ProtiFi, USA). Briefly, 2.5 µL  
158 of 12% phosphoric acid was added to each sample, followed by the addition of 165 µL S-Trap binding  
159 buffer (100 mM TEAB in 90% methanol, pH 7.1). Samples were added to S-Trap Micro spin columns  
160 followed by centrifugation (4,000 g, 2 min). Each S-Trap Mini-spin column was washed with 150 µL S-  
161 trap binding buffer by centrifugation (4,000 g, 1 min). This process was repeated for a total of 4  
162 washes. 25 µL of 50 mM TEAB, pH 8.0 containing trypsin (1:20 ratio of trypsin to protein) was added  
163 to each sample, followed by proteolytic digestion for 3 hours at 47°C without shaking. Peptides were  
164 eluted with 50 mM TEAB pH 8.0 and centrifugation (4,000 g, 2 min). Elution steps were repeated twice  
165 more, using 0.2% formic acid and 0.2% formic acid in 50% acetonitrile, respectively. The three eluates  
166 from each sample were combined and dried using a speed-vac before storage at -80°C.

167

168 **TMT-16 plex labelling**

169 Each 30 µg protein digest was resuspended in 25 µL 100 mM HEPES, pH 8.5. TMT-16 plex labelling  
170 (TMT lot number: UI292951) was carried out as per the manufacturer's instructions. Samples were  
171 assigned to a TMT tag. 10 µL of the corresponding TMT tag was added per sample and incubated for  
172 1 hour at RT. An aliquot corresponding to 1 µg was taken from each sample and pooled together for  
173 ratio and labelling efficiency checks, prior to making the full pooled sample. The test pool was

174 quenched with 0.69  $\mu\text{L}$  of 5% hydroxylamine, incubated for 15 min at room temperature, and dried  
175 using a speed-vac. The sample was cleaned using a C18 spin column as per the manufacturer's  
176 guidelines (Thermo Scientific), and subsequently dried using a speed-vac. Peptides (dissolved in 5%  
177 formic acid) from the pooled sample were analysed for labelling efficiency and ratio check. For the  
178 ratio check, each sample (corresponding to a single TMT channel) was normalised to the average  
179 summed intensity of all samples within its pool. Each sample was quenched with 2.5  $\mu\text{L}$  5%  
180 hydroxylamine and incubated for 15 min. Subsequently, samples were pooled together based on the  
181 scaling factors, which were calculated using the test pool. Samples were dried using a speed-vac,  
182 cleaned using MacroSpin columns as per the manufacturer's guidelines (Harvard Apparatus, USA), and  
183 dried down again using a speed-vac prior to offline high-performance liquid chromatography (HPLC)  
184 fractionation.

185

#### 186 **Offline HPLC Fractionation**

187 Peptides were resuspended in 80  $\mu\text{L}$  ammonium formate, pH 8.0. Peptides were fractionated on a  
188 Basic Reverse Phase column (Gemini C18, 3  $\mu\text{m}$  particle size, 110A pore, 3 mm internal diameter, 250  
189 mm length, Phenomenex #00G-4439-Y0) on a Dionex Ultimate 3000 off-line LC system. All solvents  
190 used were HPLC grade (Rathburn Chemicals, UK). 40  $\mu\text{L}$  of peptide sample were loaded onto the  
191 column for 1 min at 250  $\mu\text{L}/\text{min}$  using 99% Buffer A (20 mM ammonium formate, pH 8.0) and eluted  
192 for 40 min on a linear gradient from 1 to 90% Buffer B (100% acetonitrile (ACN)). Peptide elution was  
193 monitored by UV detection at 214 nm. Fractions were collected every minute from 2 to 38 minutes  
194 for a total of 36 fractions. Fractions were pooled using non-consecutive concatenation to obtain 18  
195 pooled fractions (e.g. pooled fraction 1: fraction 1 + 19). Each fraction was acidified to a final  
196 concentration of 1% TFA and dried using a speed-vac.

197

#### 198 **Mass spectrometry**

199 Peptides were dissolved in 5% formic acid, and each sample was independently analysed on an  
200 Orbitrap Fusion Lumos Tribrid mass spectrometer (Thermo Fisher Scientific), connected to an UltiMate  
201 3000 RSLCnano System (Thermo Fisher Scientific). Peptides (~2 µg per fraction) were injected on an  
202 Acclaim PepMap 100 C18 LC trap column (100 µm ID × 20 mm, 3 µm, 100 Å) followed by separation  
203 on an EASY-Spray nanoLC C18 column (75 ID µm × 750 mm, 2 µm, 100 Å) at a flow rate of 200 nL/min.  
204 Solvent A was 0.1% formic acid in H<sub>2</sub>O and solvent B was 80% ACN containing 0.1% formic acid. The  
205 gradient used for analysis of proteome samples was as follows: solvent B was maintained at 3% for  
206 5 min, followed by an increase of solvent B from 3% to 35% in 120 min, 35% to 90% B in 0.5 min,  
207 maintained at 90% B for 4 min, followed by a decrease to 3% in 0.5 min and equilibration at 3% for  
208 20 min. Mass spectrometric identification and quantification was performed on an Orbitrap Fusion  
209 Tribrid mass spectrometer (Thermo-Fisher Scientific) operated in data-dependent, positive ion mode.  
210 Full scan spectra were acquired in a range from 375 m/z to 1500 m/z, at a resolution of 120,000, with  
211 a standard automated gain control (AGC) (Tune 3.3) and a maximum injection time of 50 ms. Precursor  
212 ions were isolated with a quadrupole mass filter width of 0.7 m/z and CID fragmentation was  
213 performed in one-step collision energy of 30% and 0.25 activation Q. Detection of MS/MS fragments  
214 was acquired in the linear ion trap in a rapid mode using a Top 3s method, with a standard AGC target  
215 and a maximum injection time of 50 ms. The dynamic exclusion of previously acquired precursor was  
216 enabled for 60 s with a tolerance of +/-10 ppm. Quantitative analysis of TMT-tagged peptides was  
217 performed using FTMS3 acquisition in the Orbitrap mass analyser operated at 60,000 resolution, with  
218 a standard AGC target and maximum injection time of 118 ms. HCD fragmentation on MS/MS  
219 fragments was performed in one-step collision energy of 55% to ensure maximal TMT reporter ion  
220 yield and synchronous-precursor-selection (SPS) was enabled to include 10 MS/MS fragment ions in  
221 the FTMS3 scan.

222

223 **Mass spectrometry data analysis**

224 All spectra were analysed using MaxQuant 1.6.10.43 and searched against SwissProt *Homo*  
225 *sapiens* (with 42423 sequences) and Trembl SARS-CoV-2 (with 107 sequences) FASTA files. Peak list  
226 generation was performed within MaxQuant and searches were performed using default parameters  
227 and the built-in Andromeda search engine. Reporter ion MS3 was used for quantification and the  
228 additional parameter of quantitation labels with 16 plex TMT on N-terminus or lysine was included.  
229 The enzyme specificity was set to consider fully tryptic peptides, and two missed cleavages were  
230 allowed. Oxidation of methionine and N-terminal acetylation were allowed as variable modifications.  
231 Carbamidomethylation of cysteine was allowed as a fixed modification. A protein and peptide false  
232 discovery rate (FDR) of less than 1% was employed in MaxQuant. Reporter ion intensities were used  
233 for data analysis. Briefly, the data were filtered to remove proteins that matched to a contaminant or  
234 a reverse database, which were only identified by site, which were not quantified in every sample, or  
235 which contained less than 2 unique peptides. Reporter ion intensity values were  $\log_2$  transformed.  
236 Each sample within a TMT set was then normalised to the average median intensity of all 12 samples  
237 within that set. Moderated *t*-tests, with patient accounted for in the linear model, was performed  
238 using Limma, where proteins with an adjusted  $P < 0.05$  were considered as statistically significant.  
239 Proteins with differential abundance (adjusted p-value  $< 0.05$  and fold change  $> 1.5$ ) were analysed  
240 using the search tool for retrieval of interacting genes (STRING) database version 11 (<https://string->  
241 [db.org/](https://string-db.org/)). The data was modified for presentation using Cytoscape version 3.7.2. Proteins were  
242 grouped by functional categories based Uniprot annotation (<https://www.uniprot.org>). Active  
243 interaction sources, including experiments and databases, and an interaction score  $> 0.7$  were applied  
244 to construct the protein-protein interaction networks. In the network, the nodes correspond to the  
245 proteins identified and the edges represent the interactions. The node colour gradient depicts fold  
246 change in protein expression in infected compared to mock samples. All analysis was performed using  
247 R 3.6.2.  
248  
249
